# Supplementary material for: Amorphous silica nanoparticle-induced perturbation of cholesterol homeostasis as a function of surface area highlights safe-by-design implementation: an integrated multi-OMICS analysis
Source: Royal Society of Chemistry journal article supplement (doi:10.1039/c6ra06006d), 2016-01-01
Supplement: c6ra06006d1.pdf [file c6ra06006d1.pdf]

## Supplementary materials

### Materials Methods

#### Cytotoxicity and cell viability

Cytotoxicity of aSiNP-116 was determined by EZ-Cytox cell viability assay kit (Daeil Lab Service, Korea) based on the cleavage of the tetrazolium salt to water-soluble formazan by succinate-tetrazolium reductase. Approximately,  $5 \times 10^3$  cells/well were seeded in 96-well plates 24 h prior to treatment and exposed to a range of concentrations (from 5 mg/L to 200 mg/L) of aSiNP-116 for next 24 h in total MEM. In addition, the cells (in 96-well plates) were exposed to aSiNP-116 (100 mg/L) for different time point (from 4 h to 72 h). After completion of exposure 10  $\mu$ L of EZ-Cytox reagent was added to each well including treated and control (without aSiNP). Absorbance ( $OD_{450}$ ) was detected at 450 nm after 3 h of incubation at 37°C.

Appropriate blanks were used for each concentration to validate the absorbance.

The cell viability was measured using standard trypan blue (Invitrogen) staining method and the total numbers of stained and unstained cells counted using a hemocytometer. All the viability measured in three biological replicates each with duplicates.

#### Total RNA extraction and quantitative real-time PCR (qRT-PCR)

Total RNA from aSiNP-116 treated cell samples (100 mg/L for 24 h) were extracted by using RNA extraction kit (NucleoSpin, Macherey-Nagel) and the quantity and quality of RNAs were detected in nanodrop spectrophotometer (ND-1000, NanoDrop Technologies, Inc., DE, USA) as well as with agarose gel separation.

Synthesis of cDNAs was performed by a reverse transcriptase (RT) reaction and PCR amplification was carried out with a thermal cycler (Bio-Rad). Real time RT-PCR analysis was

accomplished with CFX manager (Bio-Rad) using the IQ<sup>TM</sup> SYBR Green SuperMix (Bio-Rad). The primers were constructed (by Primer3plus) based on sequences available in NCBI and the qRT-PCR conditions were optimized (efficiency and sensitivity tests) for each primer prior to the experiment (Supplementary Table S1). Three biological replicates each with triplicate were used for each qRT-PCR analysis. Analysis of negative control reactions (minus RT and all reagents minus template) confirmed no DNA contamination. The gene expressions were normalized by using GAPDH and  $\beta$ -Actin as housekeeping gene.

### **Microarray and Global gene expression Analysis**

Cells were exposed to aSiNP-116 (100 mg/L) for 24 h and then total RNA were extracted from treated and control cells by using RNeasy Mini Kits (Qiagen, Hilden, Germany). RNA quality was assessed by Agilent 2100 bioanalyser using the RNA 6000 Nano Chip (Agilent Technologies, Amstelveen, The Netherlands), and quantity was determined by ND-1000 Spectrophotometer (NanoDrop Technologies, Inc., DE, USA). Next, RNA samples were hybridized to the Affymetrix Gene Chip according to the manufacturer's instructions (<http://www.affymetrix.com>). Briefly, 300 ng of total RNA from each sample was converted to cDNA, after amplification, the double strands of cDNA was labeled with biotin-labeling (Ambion® WT Expression kit). The amplified RNA was fragmented using 4.8  $\mu$ L of 5X fragmentation buffer (GeneChip® WT Terminal labeling kit; Affymetrix;P/N 900671). Fragmentation was checked on Agilent 2100 bioanalyser and hybridized to the gene containing over 33,290 transcripts, as described in the Gene Chip Expression Analysis Technical Manual (Affymetrix). After hybridization, the chips were stained and washed in a Genechip Fluidics

Station 450 (Affymetrix) and scanned by using a Genechip Array scanner 3000 7G (Affymetrix).

Data Analysis - Affymetrix GeneChip® Human Gene 1.0 ST Array™ array was scanned using Affymetrix Model 3000 G7 scanner and the image data was extracted through Affymetrix Command Console software 1.1. The data were subjected to normalization, background correction and data summarization using Affymetrix Expression Console software with the standard Robust Multi-array Average (RMA) algorithm. Data were deposited in Gene Expression Omnibus (GSE51276). Only the probes with a detection P value < 0.01 in more than 50% of arrays were included for further analyses. The web-based tool, DAVID (the Database for Annotation, Visualization, and Integrated Discovery) was used to perform the biological interpretation of differentially expressed genes. Functional annotation of genes were performed based on Gene Ontology (GO), classified into three ontologies - Biological Process, Molecular Function and Cellular Component, as extracted from DAVID database.

### **Network analysis using Pathway studio**

Pathway analysis was performed by two approaches – one with Gene set enrichment analysis (GSEA) software using the complete set of gene expression data from the microarray experiments, and the KEGG pathway exploiting the DAVID database using the list of more than 1.5 fold DGE. The network analysis was carried out by pathway studio (pathway Studio v 9.0 program, Ariadne Transcriptomics, Inc.).

### **GC-MS based lipid analysis**

Sample preparation – The aSiNPs (aSiNP-189, aSiNP-116, aSiNP-26, aSiNP-8) treated and untreated control samples were collected with standard trypsinization and after by PBS washing, 600  $\mu$ l of MeOH/CHCl<sub>3</sub> mix (2:1, v/v) were added to the samples, followed by 15 min in an ice-bath and centrifuged at 13,000 g for 15 min. Next, 400  $\mu$ L of methanol and distilled water (1:1, v/v) mix was added and centrifuged 3000 rpm for 10 min. After that, organic layers were extracted and dried under nitrogen gas. The lipid metabolites in extract were dissolved with 30  $\mu$ l of ethyl acetate and then vortexed for 30 sec. The sample was trimethylsilylated with 30  $\mu$ l of MSTFA at 80 °C for 30 min.

GC–MS/MS conditions - The sample analysis was carried out with an Agilent-6890N gas chromatography (Palo Alto, CA, USA) with DB-5MS capillary column (30 m  $\times$  0.25 mm  $\times$  0.25  $\mu$ m film, J&W Scientific Folsom, CA, USA) and coupled with an Agilent-5973 mass selective detector. Ultra-high purity helium was used as a carrier gas at a flow rate of 1.0 mL/min. One  $\mu$ L of sample was introduced by split injection mode (split ratio 10:1). The temperature conditions of the GC injection port and the MS interface were set at 280° C and 270° C, respectively. The oven temperature was held at 80° C for 3 min, elevated to 200° C at 15° C/min, and then ramped to 280° C at 10° C/min held for 10 min. The mass spectrometer was run in the electron ionization (EI) mode with electron energy of 70 eV. The mass scan ranged from 70 to 650 amu. The manifold temperature was maintained at 230° C.

Metabolite Identification and Statistical Analyses - Most of peaks in total ion chromatograms were identified by comparing the retention times and mass spectra of authentic standards (malic acid, phosphoric acid, proline, o-hydroxybenzaldehyde, dibutylphthalate, palmitic acid, stearic acid, and cholesterol). Some of minor components were characterized and tentatively identified by correlating data with similarities higher than 90% in accordance with NIST/Wiley library.

The amounts of the individual components observed in total ion chromatogram were expressed as the peak area. Here, we assumed that the response factors of the individual components were identical. The mean amount and relative standard deviation of the individual components were obtained from triplicate analyses.

### **Metabolomics pathway analysis and integrated Transcriptomics-metabolomics analysis**

Metabolomics pathway analysis as well as enrichment based pathway analysis were performed by using MetaboAnalyst 3.0 software (a web service for metabolomics data analysis) (Xia and Wishart, 2011) with the metabolites that displayed >1.5 fold changes in aSiNP s treatment. Integrated Transcriptomics and metabolomics pathway analysis were carried out with freely available IMPaLA (<http://impala.molgen.mpg.de/>) software (Brink-Jensen *et al.*, 2013; Kamburov *et al.*, 2011) with the microarray DGE (>1.5 fold) as well as significantly altered metabolites (>1.5 fold) due to aSiNP treatment.

### **Total cholesterol measurement**

The total cholesterol measurements were performed with colorimetric total cholesterol assay kit (Cell Biolabs Inc., Catalogue No: STA-384) by following the manufacturer's instructions. Briefly, cell extracts were prepared with chloroform: isopropanol: NP40 (7:11:0.1) from control and aSiNP (aSiNP-189, aSiNP-116, aSiNP-26 and aSiNP-8) treated (with 10, 25, 50, 100 and 200 mg/L of doses for 24 h) HepG2 cells. Next, the extracted organic phases were air dried at 50° C and the dried lipids were dissolved in 1X assay diluents. In each well of a 96 well plates, 50 µl of samples were mixed with 50 µl cholesterol reaction reagents (cholesterol oxidase – 1:50, HRP – 1:50, Colorimetric probe – 1:50 and cholesterol esterase 1:250 in 1X assay diluent). After

well mixing, the plates were incubated at 37°C for 45 min and the absorbance was measured at 570 nm in ELISA plate reader. The calculations of the total cholesterol deduced from standard curve. The experiments were carried out in three biological replicates each with duplicate.

**Table S1:** Primers used for the amplification of the human cDNA

| <b>Gene Names</b> | <b>Primer sequences</b>                                    |
|-------------------|------------------------------------------------------------|
| CYP51A1           | 5' GCGTCCTTTGACTGATGAT 3'<br>5' AGAAGCCCATCCAAGCACTA 3'    |
| CDK1              | 5' TTTTCAGAGCTTTGGGCACT 3'<br>5' AGGCTTCCTGGTTCCATTT 3'    |
| KCNJ10            | 5' GCGGAGAGTCCTGACAAAAG 3'<br>5' CCACTGCATGTCAATGAAGG 3'   |
| ACSS2             | 5' TTCTACACAGCACCCACAGC 3'<br>5' TTCACCCACTGTGCCTAACA 3'   |
| MVD               | 5' GCGATGAAGAGCTGGTTCTG 3'<br>5' TGAAGTCCTTGCTGATGACG 3'   |
| FDPS              | 5' TTTAGGAGTACCCGCCAACA 3'<br>5' GAAGACCCCCACAGATCTCA 3'   |
| HMGCS1            | 5' AAGGTGCAGGGGAGTTAGGT 3'<br>5' GAACTGTCTGCCAGGTGAT 3'    |
| HMGCR             | 5' ACCACAGAGGCTATGATTGAGG 3'<br>5' ATGGCGGTGACAATGTTTGC 3' |
| SREBF1            | 5' CTGCTGTCCACAAAAGCAAA 3'                                 |

|        |                                                             |
|--------|-------------------------------------------------------------|
|        | 5' GGTCAGTGTGTCCTCCACCT 3'                                  |
| SREBF2 | 5' TGGATGATGCAAAGGTCAAA 3'<br>5' GAGAGGCACAGGAAGGTGAG 3'    |
| ACTB   | 5' GATGAGATTGGCATGGCTTT 3'<br>5' CACCTTCACCGTTCCAGTTT 3'    |
| GAPDH  | 5'CATCAAGAAGGTGGTGAAGCAGG3'<br>5'TGTCGCTGTTGAAGTCAGAGGAGA3' |

## Results

**Table S2:** Functional Annotation Clustering (Enrichment Score > 3.00) performed with microarray DGE due to aSiNP-116 exposure (>1.5 fold) by using DAVID

| <b>Enrichment Score: 4.49</b>                                               | <b>Count</b> | <b>p-Value</b> |
|-----------------------------------------------------------------------------|--------------|----------------|
| Steroid biosynthesis                                                        | 7            | 1.4E-7         |
| steroid metabolic process                                                   | 11           | 3.3E-7         |
| cholesterol biosynthetic process                                            | 6            | 4.0E-7         |
| sterol biosynthetic process                                                 | 6            | 1.9E-6         |
| lipid synthesis                                                             | 8            | 2.3E-6         |
| cholesterol metabolic process                                               | 7            | 1.8E-5         |
| lipid biosynthetic process                                                  | 11           | 2.2E-5         |
| <b>Enrichment Score: 3.26</b>                                               | <b>Count</b> | <b>p-Value</b> |
| Glutathione S-transferase, alpha class                                      | 4            | 2.2E-6         |
| Metabolism of xenobiotics by cytochrome P450                                | 6            | 8.2E-5         |
| Drug metabolism                                                             | 6            | 9.6E-5         |
| glutathione transferase activity                                            | 4            | 3.2E-4         |
| transferase activity, transferring alkyl or aryl (other than methyl) groups | 5            | 3.3E-4         |
| Glutathione metabolism                                                      | 4            | 6.4E-3         |
| Thioredoxin fold                                                            | 4            | 2.4E-2         |



**Table S3:** Selected genes with the strong differential expression (>1.5 fold) due to aSiNP-116 exposure at 100 mg/L dose for 24 h

| Gene Accession                                                          | Gene Symbol | Gene Description                                | absolute fold change | GO Biological Process Term                                                                                                                                                                                                                                                     | GO Cellular Component Term                                                                   | GO Molecular Function Term                                                                                                                                                |
|-------------------------------------------------------------------------|-------------|-------------------------------------------------|----------------------|--------------------------------------------------------------------------------------------------------------------------------------------------------------------------------------------------------------------------------------------------------------------------------|----------------------------------------------------------------------------------------------|---------------------------------------------------------------------------------------------------------------------------------------------------------------------------|
| <b>Selected Genes up regulated (&gt;1.5 fold) due to aSiNP exposure</b> |             |                                                 |                      |                                                                                                                                                                                                                                                                                |                                                                                              |                                                                                                                                                                           |
| NM_005165                                                               | ALDOC       | aldolase C, fructose-bisphosphate               | 2.0150589            | response to hypoxia, fructose metabolic process, glycolysis, apoptosis, aging, response to organic nitrogen, response to organic cyclic substance, fructose 1,6-bisphosphate metabolic process, organ regeneration, protein homotetramerization, protein heterotetramerization | Cytoplasm, mitochondrion, cytoskeleton, axon                                                 | fructose-bisphosphate aldolase activity, protein binding, cytoskeletal protein binding, lyase activity                                                                    |
| NM_018677                                                               | ACSS2       | acyl-CoA synthetase short-chain family member 2 | 1.9162529            | lipid biosynthetic process                                                                                                                                                                                                                                                     | Nucleus, nucleolus, cytoplasm, cytosol, intracellular membrane-bounded organelle             | nucleotide binding, acetate-CoA ligase activity, protein binding, ATP binding, AMP binding, ligase activity                                                               |
| NM_004265                                                               | FADS2       | fatty acid desaturase 2                         | 1.8102513            | unsaturated fatty acid biosynthetic process, transport, electron transport chain                                                                                                                                                                                               | membrane fraction, endoplasmic reticulum, endoplasmic reticulum membrane, integral to plasma | stearoyl-CoA 9-desaturase activity oxidoreductase activity, acting on paired donors, with oxidation of a pair of donors resulting in the reduction of molecular oxygen to |

|                  |             |                                                                  |               |                                                                                                                                                                                                                                                                                                                                        |                                                                                                                                          |                                                                                                                                                  |
|------------------|-------------|------------------------------------------------------------------|---------------|----------------------------------------------------------------------------------------------------------------------------------------------------------------------------------------------------------------------------------------------------------------------------------------------------------------------------------------|------------------------------------------------------------------------------------------------------------------------------------------|--------------------------------------------------------------------------------------------------------------------------------------------------|
|                  |             |                                                                  |               |                                                                                                                                                                                                                                                                                                                                        | membrane,<br>membrane                                                                                                                    | two molecules of<br>water, heme binding                                                                                                          |
| NM_0010<br>05179 | OR56A4      | olfactory<br>receptor,<br>family 56,<br>subfamily A,<br>member 4 | 1.8039<br>12  | sensory<br>perception of<br>smell,<br>response to<br>stimulus                                                                                                                                                                                                                                                                          | plasma<br>membrane,<br>integral to<br>membrane                                                                                           | receptor activity,<br>olfactory receptor<br>activity                                                                                             |
| NR_0293<br>72    | NT5C3       | 5'-<br>nucleotidase,<br>cytosolic III                            | 1.7966<br>221 | pyrimidine<br>nucleoside<br>metabolic<br>process,<br>nucleotide<br>metabolic<br>process                                                                                                                                                                                                                                                | cytoplasm<br>mitochondrio<br>n,<br>endoplasmic<br>reticulum                                                                              | nucleotide binding,<br>magnesium ion<br>binding, 5'-<br>nucleotidase<br>activity, 2'-<br>phosphotransferase<br>activity, hydrolase<br>activity   |
| NM_0013<br>60    | DHCR7       | 7-<br>dehydrochole<br>sterol<br>reductase                        | 1.7800<br>157 | blood vessel<br>development,<br>cholesterol<br>biosynthetic<br>process, post-<br>embryonic<br>development,<br>cell<br>differentiation<br>lung<br>development,<br>multicellular<br>organism<br>growth,<br>regulation of<br>cell<br>proliferation,<br>regulation of<br>cholesterol<br>biosynthetic<br>process,<br>oxidation<br>reduction | nuclear outer<br>membrane,<br>endoplasmic<br>reticulum,<br>endoplasmic<br>reticulum<br>membrane,<br>membrane,<br>integral to<br>membrane | protein binding,<br>oxidoreductase<br>activity, 7-<br>dehydrocholesterol<br>reductase activity                                                   |
| NM_0036<br>70    | BHLHE<br>40 | basic helix-<br>loop-helix<br>family,<br>member e40              | 1.7746<br>727 | regulation of<br>transcription,<br>DNA-<br>dependent,<br>circadian<br>rhythm,<br>response to<br>light stimulus,<br>entrainment of<br>circadian<br>clock,<br>regulation of                                                                                                                                                              | nucleus                                                                                                                                  | DNA binding,<br>sequence-specific<br>DNA binding<br>transcription factor<br>activity, protein<br>binding,<br>transcription<br>repressor activity |

|              |          |                                                                                               |           |                                                                                                                                                                                               |                                                                                                    |                                                                                                                                                                       |
|--------------|----------|-----------------------------------------------------------------------------------------------|-----------|-----------------------------------------------------------------------------------------------------------------------------------------------------------------------------------------------|----------------------------------------------------------------------------------------------------|-----------------------------------------------------------------------------------------------------------------------------------------------------------------------|
|              |          |                                                                                               |           | neuronal synaptic plasticity                                                                                                                                                                  |                                                                                                    |                                                                                                                                                                       |
| NM_007128    | VPREB1   | pre-B lymphocyte 1                                                                            | 1.7719636 | immune response                                                                                                                                                                               | extracellular region                                                                               | antigen binding, protein binding                                                                                                                                      |
| NM_002461    | MVD      | mevalonate (diphospho) decarboxylase                                                          | 1.7683134 | cholesterol biosynthetic process, positive regulation of cell proliferation, isoprenoid biosynthetic process, response to drug                                                                | soluble fraction, peroxisome peroxisomal matrix, cytosol,                                          | nucleotide binding diphosphomevalonate decarboxylase activity, ATP binding, kinase activity, lyase activity, Hsp70 protein binding, protein homodimerization activity |
| NM_001005522 | OR2T8    | olfactory receptor, family 2, subfamily T, member 8                                           | 1.7589287 | sensory perception of smell, response to stimulus                                                                                                                                             | plasma membrane, integral to membrane                                                              | receptor activity, olfactory receptor activity                                                                                                                        |
| NM_002340    | LSS      | lanosterol synthase (2,3-oxidosqualene-lanosterol cyclase)                                    | 1.7175106 | steroid biosynthetic process, cholesterol biosynthetic process, steroid metabolic process, sterol metabolic process                                                                           | endoplasmic reticulum, endoplasmic reticulum membrane, microsome, membrane                         | lanosterol synthase activity, intramolecular transferase activity                                                                                                     |
| NM_000602    | SERPINE1 | serpin peptidase inhibitor, clade E (nexin, plasminogen activator inhibitor type 1), member 1 | 1.7116052 | response to reactive oxygen species, chronological cell aging, regulation of receptor activity, negative regulation of plasminogen activation, negative regulation of endopeptidase activity, | extracellular region, extracellular space, soluble fraction, plasma membrane, extracellular matrix | protease binding, serine-type endopeptidase inhibitor activity, receptor binding, protein binding, peptidase inhibitor activity                                       |

|  |  |  |  |                                                                                                                                                                                                                                                                                                                                                                                                                                                                                                                                                                                                 |  |  |
|--|--|--|--|-------------------------------------------------------------------------------------------------------------------------------------------------------------------------------------------------------------------------------------------------------------------------------------------------------------------------------------------------------------------------------------------------------------------------------------------------------------------------------------------------------------------------------------------------------------------------------------------------|--|--|
|  |  |  |  | negative regulation of smooth muscle cell migration, positive regulation of blood coagulation, negative regulation of blood coagulation, negative regulation of cell migration, positive regulation of interleukin-8 production, negative regulation of cell adhesion mediated by integrin, response to cytokine stimulus, positive regulation of leukotriene production involved in inflammatory response, regulation of cell proliferation, tissue regeneration, glucose homeostasis, negative regulation of apoptosis, positive regulation of angiogenesis, positive regulation of receptor- |  |  |
|--|--|--|--|-------------------------------------------------------------------------------------------------------------------------------------------------------------------------------------------------------------------------------------------------------------------------------------------------------------------------------------------------------------------------------------------------------------------------------------------------------------------------------------------------------------------------------------------------------------------------------------------------|--|--|

|           |       |                                            |           |                                                                                                                                                                                                                                                                                                                                                                       |                      |                                                                                       |
|-----------|-------|--------------------------------------------|-----------|-----------------------------------------------------------------------------------------------------------------------------------------------------------------------------------------------------------------------------------------------------------------------------------------------------------------------------------------------------------------------|----------------------|---------------------------------------------------------------------------------------|
|           |       |                                            |           | mediated endocytosis, positive regulation of inflammatory response, defense response to Gram-negative bacterium, response to glucocorticoid stimulus, negative regulation of fibrinolysis, negative regulation of vascular wound healing, cellular response to chemical stimulus, cellular response to lipopolysaccharide, positive regulation of monocyte chemotaxis |                      |                                                                                       |
| NM_133459 | CCBE1 | collagen and calcium binding EGF domains 1 | 1.7070922 | Lymphangiogenesis, sprouting angiogenesis, multicellular organismal development, venous blood vessel morphogenesis                                                                                                                                                                                                                                                    | extracellular region | calcium ion binding                                                                   |
| NM_002297 | LCN1  | lipocalin 1 (tear prealbumin)              | 1.7053856 | Proteolysis, response to stimulus, sensory perception of taste                                                                                                                                                                                                                                                                                                        | extracellular region | cysteine-type endopeptidase inhibitor activity, transporter activity, protein binding |
| NM_0005   | LDLR  | low density                                | 1.6650    | protein O-                                                                                                                                                                                                                                                                                                                                                            | Lysosome,            | transmembrane                                                                         |

|              |        |                                                      |           |                                                                                                                                                                                                                                                                                                                                                                                |                                                                                                                                                                                                                      |                                                                                                                                                    |
|--------------|--------|------------------------------------------------------|-----------|--------------------------------------------------------------------------------------------------------------------------------------------------------------------------------------------------------------------------------------------------------------------------------------------------------------------------------------------------------------------------------|----------------------------------------------------------------------------------------------------------------------------------------------------------------------------------------------------------------------|----------------------------------------------------------------------------------------------------------------------------------------------------|
| 27           |        | lipoprotein receptor                                 | 667       | linked glycosylation, lipid metabolic process, lipid transport, endocytosis, steroid metabolic process, cholesterol metabolic process, intestinal cholesterol absorption, cholesterol transport, low-density lipoprotein particle clearance, lipoprotein catabolic process, cholesterol homeostasis, response to estrogen stimulus, interspecies interaction between organisms | early endosome, plasma membrane, integral to plasma membrane, caveola, coated pit, external side of plasma membrane, endosome membrane, clathrin-coated endocytic vesicle membrane, low-density lipoprotein particle | receptor activity, low-density lipoprotein receptor activity, calcium ion binding, protein binding, very-low-density lipoprotein receptor activity |
| NM_001004481 | OR13C2 | olfactory receptor, family 13, subfamily C, member 2 | 1.6521263 | sensory perception of smell, response to stimulus                                                                                                                                                                                                                                                                                                                              | plasma membrane, integral to membrane                                                                                                                                                                                | receptor activity, olfactory receptor activity                                                                                                     |
| NM_015234    | GPR116 | G protein-coupled receptor 116                       | 1.6499371 | G-protein coupled receptor protein signaling pathway, neuropeptide signaling pathway                                                                                                                                                                                                                                                                                           | plasma membrane, integral to membrane                                                                                                                                                                                | G-protein coupled receptor activity                                                                                                                |
| NM_005031    | FXYD1  | FXYD domain containing                               | 1.6494328 | ion transport, chloride transport,                                                                                                                                                                                                                                                                                                                                             | plasma membrane, integral to                                                                                                                                                                                         | ion channel activity, chloride channel activity, protein                                                                                           |

|           |         |                            |           |                                                                                                                                                                                                                                                                                                                                                                                                     |                                             |                                                                                                                                                                                                                                                                                                                                                                              |
|-----------|---------|----------------------------|-----------|-----------------------------------------------------------------------------------------------------------------------------------------------------------------------------------------------------------------------------------------------------------------------------------------------------------------------------------------------------------------------------------------------------|---------------------------------------------|------------------------------------------------------------------------------------------------------------------------------------------------------------------------------------------------------------------------------------------------------------------------------------------------------------------------------------------------------------------------------|
|           |         | ion transport regulator 1  |           | cellular calcium ion homeostasis, muscle contraction                                                                                                                                                                                                                                                                                                                                                | plasma membrane, chloride channel complex   | binding                                                                                                                                                                                                                                                                                                                                                                      |
| NM_005584 | MAB21L1 | mab-21-like 1 (C. elegans) | 1.6484579 | multicellular organismal development, positive regulation of cell proliferation, anatomical structure morphogenesis, camera-type eye development                                                                                                                                                                                                                                                    | nucleus                                     | ---                                                                                                                                                                                                                                                                                                                                                                          |
| NM_000044 | AR      | androgen receptor          | 1.6482888 | in utero embryonic development, transcription, DNA-dependent, transport, signal transduction, cell-cell signaling, sex differentiation, cell death, cell proliferation, male gonad development, positive regulation of gene-specific transcription from RNA polymerase II promoter, cell growth, male somatic sex determination, prostate gland development, response to insulin stimulus, positive | Nucleus, nucleus, cytoplasm, axon, dendrite | DNA binding, sequence-specific DNA binding transcription factor activity, receptor activity, androgen receptor activity, receptor binding, androgen binding, protein binding, beta-catenin binding, transcription factor binding, zinc ion binding, promoter binding, transcription activator activity, metal ion binding, protein dimerization activity, POU domain binding |

|  |  |  |  |                                                                                                                                                                                                                                                                                                                                                                                                                                                                                                                                                                                                           |  |  |
|--|--|--|--|-----------------------------------------------------------------------------------------------------------------------------------------------------------------------------------------------------------------------------------------------------------------------------------------------------------------------------------------------------------------------------------------------------------------------------------------------------------------------------------------------------------------------------------------------------------------------------------------------------------|--|--|
|  |  |  |  | regulation of estrogen receptor signaling pathway, positive regulation of MAPKKK cascade, positive regulation of insulin-like growth factor receptor signaling pathway, male sex differentiation, regulation of developmental growth, organ formation, negative regulation of epithelial cell proliferation, regulation of catalytic activity, activation of prostate induction by androgen receptor signaling pathway, morphogenesis of an epithelial fold, lateral sprouting involved in mammary gland duct morphogenesis, regulation of prostatic bud formation, prostate gland growth, prostate gland |  |  |
|--|--|--|--|-----------------------------------------------------------------------------------------------------------------------------------------------------------------------------------------------------------------------------------------------------------------------------------------------------------------------------------------------------------------------------------------------------------------------------------------------------------------------------------------------------------------------------------------------------------------------------------------------------------|--|--|



|              |        |                                                               |           |                                                                                                                                            |                                               |                                                                                                                                                                             |
|--------------|--------|---------------------------------------------------------------|-----------|--------------------------------------------------------------------------------------------------------------------------------------------|-----------------------------------------------|-----------------------------------------------------------------------------------------------------------------------------------------------------------------------------|
|              |        |                                                               |           | epithelium morphogenesis, epithelial cell differentiation involved in prostate gland development, mammary gland alveolus development       |                                               |                                                                                                                                                                             |
| NM_001002841 | MYL4   | myosin, light chain 4, alkali; atrial, embryonic              | 1.6338075 | regulation of the force of heart contraction, muscle organ development, positive regulation of ATPase activity, cardiac muscle contraction | muscle myosin complex, myosin complex, A band | motor activity, actin monomer binding, calcium ion binding, structural constituent of muscle, myosin II heavy chain binding, actin filament binding                         |
| NM_002241    | KCNJ10 | potassium inwardly-rectifying channel, subfamily J, member 10 | 1.6095116 | ion transport, potassium ion transport                                                                                                     | integral to plasma membrane, membrane         | nucleotide binding, voltage-gated ion channel activity, potassium channel activity, protein binding, ATP binding, ATP-activated inward rectifier potassium channel activity |
| NM_052995    | CLRN1  | clarin 1                                                      | 1.6069366 | sensory perception of sound, photoreceptor cell maintenance, response to stimulus, sensory perception of light stimulus, equilibrium       | Membrane, integral to membrane                | ---                                                                                                                                                                         |
| NM_002900    | RBP3   | retinol binding protein 3,                                    | 1.5969698 | Proteolysis, lipid metabolic                                                                                                               | extracellular region, interphotorec           | retinoid binding, serine-type peptidase activity,                                                                                                                           |

|               |              |                                           |               |                                                                                                                                                                                                                      |                                                                                                    |                                                                                                                                                   |
|---------------|--------------|-------------------------------------------|---------------|----------------------------------------------------------------------------------------------------------------------------------------------------------------------------------------------------------------------|----------------------------------------------------------------------------------------------------|---------------------------------------------------------------------------------------------------------------------------------------------------|
|               |              | interstitial                              |               | process,<br>transport,<br>visual<br>perception                                                                                                                                                                       | ceptor matrix                                                                                      | retinal binding                                                                                                                                   |
| NM_1775<br>51 | GPR109<br>A  | G protein-<br>coupled<br>receptor<br>109A | 1.5857<br>485 | neutrophil<br>apoptosis,<br>apoptosis,<br>positive<br>regulation of<br>neutrophil<br>apoptosis,<br>negative<br>regulation of<br>lipid catabolic<br>process,<br>positive<br>regulation of<br>adiponectin<br>secretion | plasma<br>membrane,<br>integral to<br>membrane                                                     | receptor activity,<br>GTP binding,<br>purinergic<br>nucleotide receptor<br>activity, G-protein<br>coupled, nicotinic<br>acid receptor<br>activity |
| NM_0049<br>44 | DNASE<br>1L3 | deoxyribonuc<br>lease I-like 3            | 1.5808<br>582 | DNA<br>metabolic<br>process, DNA<br>catabolic<br>process, DNA<br>fragmentation<br>involved in<br>apoptotic<br>nuclear<br>change,<br>apoptosis                                                                        | nucleus                                                                                            | DNA binding,<br>endodeoxyribonucle<br>ase activity,<br>deoxyribonuclease<br>activity, calcium ion<br>binding, hydrolase<br>activity               |
| NM_0027<br>73 | PRSS8        | protease,<br>serine, 8                    | 1.5806<br>073 | Proteolysis,<br>positive<br>regulation of<br>sodium ion<br>transport,<br>response to<br>drug, response<br>to peptide<br>hormone<br>stimulus,<br>response to<br>mineralocortic<br>oid stimulus                        | extracellular<br>region,<br>extracellular<br>space, plasma<br>membrane,<br>integral to<br>membrane | serine-type<br>endopeptidase<br>activity, peptidase<br>activity, sodium<br>channel regulator<br>activity                                          |
| NM_0528<br>90 | PGLYR<br>P2  | peptidoglycan<br>recognition<br>protein 2 | 1.5727<br>365 | peptide<br>amidation,<br>peptidoglycan<br>catabolic<br>process,<br>detection of<br>bacterium,                                                                                                                        | extracellular<br>region,<br>intracellular,<br>membrane                                             | protein binding, N-<br>acetylmuramoyl-L-<br>alanine amidase<br>activity,<br>peptidoglycan<br>receptor activity,<br>hydrolase activity,            |

|           |         |                                                     |           |                                                                                                                                                                                  |                                                                                                                                                                      |                                                                                                                                                                                         |
|-----------|---------|-----------------------------------------------------|-----------|----------------------------------------------------------------------------------------------------------------------------------------------------------------------------------|----------------------------------------------------------------------------------------------------------------------------------------------------------------------|-----------------------------------------------------------------------------------------------------------------------------------------------------------------------------------------|
|           |         |                                                     |           | innate immune response, defense response to Gram-positive bacterium                                                                                                              |                                                                                                                                                                      | peptidoglycan binding, metal ion binding                                                                                                                                                |
| NM_018935 | PCDHB15 | protocadherin beta 15                               | 1.5709268 | cell adhesion, homophilic cell adhesion, nervous system development                                                                                                              | plasma membrane, integral to plasma membrane                                                                                                                         | calcium ion binding                                                                                                                                                                     |
| NM_002668 | PLP2    | proteolipid protein 2 (colonic epithelium-enriched) | 1.5691725 | ion transport, chemotaxis, cytokine-mediated signaling pathway                                                                                                                   | membrane fraction, endoplasmic reticulum, endoplasmic reticulum membrane, plasma membrane, integral to membrane                                                      | protein binding, ion transmembrane transporter activity, chemokine binding                                                                                                              |
| NM_002004 | FDPS    | farnesyl diphosphate synthase                       | 1.5608198 | cholesterol biosynthetic process, isoprenoid biosynthetic process, interspecies interaction between organisms                                                                    | cytoplasm mitochondrion                                                                                                                                              | dimethylallyltransferase activity, geranyltransferase activity, transferase activity, metal ion binding                                                                                 |
| NM_002191 | INHA    | inhibin, alpha                                      | 1.5452369 | skeletal system development, ovarian follicle development, induction of apoptosis, cell cycle arrest, signal transduction, cell surface receptor linked signaling pathway, cell- | photoreceptor outer segment, photoreceptor inner segment, extracellular region, extracellular space, inhibin-beta glycan-ActRII complex, neuronal cell body, inhibin | signal transducer activity, receptor binding, cytokine activity, hormone activity, protein binding, growth factor activity, protein heterodimerization activity, inhibin beta-A binding |

|  |  |  |  |                                                                                                                                                                                                                                                                                                                                                                                                                                                                                                                                                                                                                                                                                                                                                                 |           |  |
|--|--|--|--|-----------------------------------------------------------------------------------------------------------------------------------------------------------------------------------------------------------------------------------------------------------------------------------------------------------------------------------------------------------------------------------------------------------------------------------------------------------------------------------------------------------------------------------------------------------------------------------------------------------------------------------------------------------------------------------------------------------------------------------------------------------------|-----------|--|
|  |  |  |  | cell signaling,<br>nervous<br>system<br>development,<br>male gonad<br>development,<br>response to<br>external<br>stimulus, cell<br>differentiation<br>, erythrocyte<br>differentiation<br>, regulation of<br>cell<br>proliferation,<br>negative<br>regulation of<br>phosphorylati<br>on,<br>hemoglobin<br>biosynthetic<br>process,<br>negative<br>regulation of<br>interferon-<br>gamma<br>biosynthetic<br>process,<br>negative<br>regulation of<br>B cell<br>differentiation<br>, negative<br>regulation of<br>macrophage<br>differentiation<br>, negative<br>regulation of<br>cell cycle,<br>positive<br>regulation of<br>follicle-<br>stimulating<br>hormone<br>secretion,<br>negative<br>regulation of<br>follicle-<br>stimulating<br>hormone<br>secretion, | A complex |  |
|--|--|--|--|-----------------------------------------------------------------------------------------------------------------------------------------------------------------------------------------------------------------------------------------------------------------------------------------------------------------------------------------------------------------------------------------------------------------------------------------------------------------------------------------------------------------------------------------------------------------------------------------------------------------------------------------------------------------------------------------------------------------------------------------------------------------|-----------|--|

|           |         |                                                         |           |                                                                                                                                |                                                                                                  |                                                                                                                    |
|-----------|---------|---------------------------------------------------------|-----------|--------------------------------------------------------------------------------------------------------------------------------|--------------------------------------------------------------------------------------------------|--------------------------------------------------------------------------------------------------------------------|
|           |         |                                                         |           | regulation of cell cycle                                                                                                       |                                                                                                  |                                                                                                                    |
| NM_016371 | HSD17B7 | hydroxysteroid (17-beta) dehydrogenase 7                | 1.5425422 | steroid biosynthetic process, oxidation reduction                                                                              | endoplasmic reticulum membrane, plasma membrane, integral to membrane                            | 3-keto sterol reductase activity, estradiol 17-beta-dehydrogenase activity, binding, oxidoreductase activity       |
| NM_206809 | MOG     | myelin oligodendrocyte glycoprotein                     | 1.5410301 | cell adhesion, central nervous system development, positive regulation of MyD88-dependent toll-like receptor signaling pathway | plasma membrane, integral to membrane                                                            | ---                                                                                                                |
| NM_020061 | OPN1LW  | opsin 1 (cone pigments), long-wave-sensitive            | 1.5395812 | signal transduction, visual perception, phototransduction, protein-chromophore linkage, response to stimulus                   | integral to plasma membrane, membrane                                                            | G-protein coupled receptor activity, photoreceptor activity                                                        |
| NM_139164 | STARD4  | StAR-related lipid transfer (START) domain containing 4 | 1.5333393 | lipid transport                                                                                                                | ---                                                                                              | lipid binding                                                                                                      |
| NM_000786 | CYP51A1 | cytochrome P450, family 51, subfamily A, polypeptide 1  | 1.5313138 | cholesterol biosynthetic process, oxidation reduction                                                                          | endoplasmic reticulum, endoplasmic reticulum membrane, microsome, membrane, integral to membrane | monooxygenase activity, sterol 14-demethylase activity, electron carrier activity, heme binding, metal ion binding |
| NM_000567 | CRP     | C-reactive protein, pentraxin-related                   | 1.5289466 | acute-phase response, inflammatory response,                                                                                   | extracellular region, extracellular space                                                        | Binding, protein binding, low-density lipoprotein binding, choline binding,                                        |

|              |        |                                                     |           |                                                                                                                                                                   |                                                                      |                                                                                              |
|--------------|--------|-----------------------------------------------------|-----------|-------------------------------------------------------------------------------------------------------------------------------------------------------------------|----------------------------------------------------------------------|----------------------------------------------------------------------------------------------|
|              |        |                                                     |           | complement activation, classical pathway, opsonization, negative regulation of macrophage derived foam cell differentiation, negative regulation of lipid storage |                                                                      | metal ion binding, Gram-positive bacterial cell surface binding                              |
| NM_001098272 | HMGCS1 | 3-hydroxy-3-methylglutaryl-CoA synthase 1 (soluble) | 1.5200618 | lipid metabolic process, cholesterol biosynthetic process, isoprenoid biosynthetic process, response to organic nitrogen, response to drug                        | soluble fraction, cytoplasm, cytosol                                 | hydroxymethylglutaryl-CoA synthase activity, transferase activity                            |
| NM_002976    | SCN7A  | sodium channel, voltage-gated, type VII, alpha      | 1.509404  | ion transport, sodium ion transport, muscle contraction, transmembrane transport                                                                                  | voltage-gated sodium channel complex, membrane, integral to membrane | voltage-gated ion channel activity, voltage-gated sodium channel activity                    |
| NM_005448    | BMP15  | bone morphogenetic protein 15                       | 1.508356  | ovarian follicle development, female gamete generation, positive regulation of transcription, granulosa cell development                                          | extracellular region, extracellular space                            | cytokine activity, growth factor activity                                                    |
| NM_003802    | MYH13  | myosin, heavy chain 13, skeletal muscle             | 1.5062654 | muscle contraction                                                                                                                                                | Cytoplasm, muscle myosin complex, myofibril,                         | microfilament motor activity, nucleotide binding, actin binding, protein binding, calmodulin |

|           |         |                                                                                  |           |                                                                                                    |                                              |                                                                                                                         |
|-----------|---------|----------------------------------------------------------------------------------|-----------|----------------------------------------------------------------------------------------------------|----------------------------------------------|-------------------------------------------------------------------------------------------------------------------------|
|           |         |                                                                                  |           |                                                                                                    | myosin filament                              | binding, ATP binding                                                                                                    |
| NM_173078 | SLITRK4 | SLIT and NTRK-like family, member 4                                              | 1.5058551 | axonogenesis                                                                                       | Membrane, integral to membrane               | protein binding                                                                                                         |
| NM_006931 | SLC2A3  | solute carrier family 2 (facilitated glucose transporter), member 3              | 1.504112  | carbohydrate metabolic process, carbohydrate transport, glucose transport, transmembrane transport | Membrane, integral to membrane               | transporter activity, glucose transmembrane transporter activity, substrate-specific transmembrane transporter activity |
| NM_014513 | KIR2DS5 | killer cell immunoglobulin-like receptor, two domains, short cytoplasmic tail, 5 | 1.5028844 | immune response                                                                                    | plasma membrane, integral to plasma membrane | receptor activity, HLA-C specific inhibitory MHC class I receptor activity                                              |

**Selected Genes down regulated (>1.5 fold) SiO2 NP**

|                 |      |                                                              |           |                                                                                                                                                                                           |                                                                                                                                                                 |                                                                   |
|-----------------|------|--------------------------------------------------------------|-----------|-------------------------------------------------------------------------------------------------------------------------------------------------------------------------------------------|-----------------------------------------------------------------------------------------------------------------------------------------------------------------|-------------------------------------------------------------------|
| ENST00000361453 | ND2  | MTND2                                                        | 2.4947081 | mitochondrial electron transport, NADH to ubiquinone, oxygen and reactive oxygen species metabolic process, transport, electron transport chain, ATP synthesis coupled electron transport | Mitochondrion, mitochondrial inner membrane, mitochondrial respiratory chain complex I, postsynaptic density, membrane, integral to membrane, respiratory chain | NADH dehydrogenase (ubiquinone) activity, oxidoreductase activity |
| BC073772        | IGKC | immunoglobulin kappa constant, immunoglobulin kappa constant | 2.4923765 | immune response, immune response                                                                                                                                                          | extracellular region                                                                                                                                            | antigen binding, protein binding                                  |
| AK172782        | GPAM | glycerol-3-                                                  | 2.39623   | fatty acid                                                                                                                                                                                | mitochondri                                                                                                                                                     | glycerol-3-                                                       |

|  |  |                                          |    |                                                                                                                                                                                                                                                                                                                                                                                                                                                                                                                                                                                   |                                                                                                      |                                                                                                                                              |
|--|--|------------------------------------------|----|-----------------------------------------------------------------------------------------------------------------------------------------------------------------------------------------------------------------------------------------------------------------------------------------------------------------------------------------------------------------------------------------------------------------------------------------------------------------------------------------------------------------------------------------------------------------------------------|------------------------------------------------------------------------------------------------------|----------------------------------------------------------------------------------------------------------------------------------------------|
|  |  | phosphate acyltransferase, mitochondrial | 77 | <p>metabolic process, acyl-CoA</p> <p>metabolic process, glycerophospholipid</p> <p>metabolic process, metabolic process, phospholipid biosynthetic process, response to glucose stimulus, response to fructose stimulus, positive regulation of triglyceride biosynthetic process, response to activity, triglyceride biosynthetic process, response to nutrient levels, cellular response to insulin stimulus, positive regulation of multicellular organism growth, positive regulation of activated T cell proliferation, response to cadmium ion, regulation of cytokine</p> | <p>on mitochondrial outer membrane, mitochondrial inner membrane, membrane, integral to membrane</p> | <p>phosphate O-acyltransferase activity, acyltransferase activity, transferase activity, glycerol-3-phosphate O-acyltransferase activity</p> |
|--|--|------------------------------------------|----|-----------------------------------------------------------------------------------------------------------------------------------------------------------------------------------------------------------------------------------------------------------------------------------------------------------------------------------------------------------------------------------------------------------------------------------------------------------------------------------------------------------------------------------------------------------------------------------|------------------------------------------------------------------------------------------------------|----------------------------------------------------------------------------------------------------------------------------------------------|



|           |             |                              |               |                                                                                                                                                                                                                                                                                                                                                                                                                                                                                                        |                         |                                                                             |
|-----------|-------------|------------------------------|---------------|--------------------------------------------------------------------------------------------------------------------------------------------------------------------------------------------------------------------------------------------------------------------------------------------------------------------------------------------------------------------------------------------------------------------------------------------------------------------------------------------------------|-------------------------|-----------------------------------------------------------------------------|
|           |             |                              |               | secretion,<br>defense<br>response to<br>virus, fatty<br>acid<br>homeostasis,<br>phospholipid<br>homeostasis,<br>negative<br>regulation of<br>activation-<br>induced cell<br>death of T<br>cells,<br>interleukin-2<br>secretion                                                                                                                                                                                                                                                                         |                         |                                                                             |
| NM_003561 | PLA2G1<br>0 | phospholipase<br>A2, group X | 2.13631<br>29 | phospholipid<br>metabolic<br>process, axon<br>guidance,<br>positive<br>regulation of<br>macrophage<br>derived foam<br>cell<br>differentiation<br>, positive<br>regulation of<br>lipid storage,<br>lipid catabolic<br>process,<br>arachidonic<br>acid<br>metabolic<br>process,<br>positive<br>regulation of<br>cellular<br>protein<br>metabolic<br>process,<br>positive<br>regulation of<br>prostaglandin<br>secretion,<br>regulation of<br>macrophage<br>activation,<br>lysophospholi<br>pid transport | extracellular<br>region | phospholipase A2<br>activity, calcium<br>ion binding,<br>hydrolase activity |

|           |              |                                                    |           |                                                                                                                                                                                                                                             |                          |                                                                                                                                                                                                                                                                                                                                                                    |
|-----------|--------------|----------------------------------------------------|-----------|---------------------------------------------------------------------------------------------------------------------------------------------------------------------------------------------------------------------------------------------|--------------------------|--------------------------------------------------------------------------------------------------------------------------------------------------------------------------------------------------------------------------------------------------------------------------------------------------------------------------------------------------------------------|
| AF284753  | UIMC1        | ubiquitin interaction motif containing 1           | 1.9853302 | double-strand break repair, response to ionizing radiation, negative regulation of transcription, chromatin modification, G2/M transition DNA damage checkpoint, positive regulation of DNA repair, histone H2A K63-linked deubiquitination | Nucleus, BRCA1-A complex | protein binding, histone binding, K63-linked polyubiquitin binding                                                                                                                                                                                                                                                                                                 |
| NM_000846 | <b>GSTA2</b> | glutathione S-transferase alpha 2                  | 1.8979619 | metabolic process                                                                                                                                                                                                                           | cytoplasm                | glutathione transferase activity, transferase activity                                                                                                                                                                                                                                                                                                             |
| NM_000670 | ADH4         | alcohol dehydrogenase 4 (class II), pi polypeptide | 1.8768352 | retinoid metabolic process, alcohol metabolic process, ethanol oxidation, cellular aldehyde metabolic process, quinone cofactor metabolic process, retinol metabolic process, alcohol catabolic process, oxidation reduction                | cytoplasm                | NADPH:quinone reductase activity, alcohol dehydrogenase (NAD) activity, alcohol dehydrogenase activity, zinc-dependent, retinol dehydrogenase activity, binding, all-trans retinal binding, zinc ion binding, oxidoreductase activity, oxidoreductase activity, acting on the aldehyde or oxo group of donors, NAD or NADP as acceptor, benzaldehyde dehydrogenase |

|              |        |                                               |               |                                                                                                                                                                                                                                  |                                                                                                        |                                                                                                                                     |
|--------------|--------|-----------------------------------------------|---------------|----------------------------------------------------------------------------------------------------------------------------------------------------------------------------------------------------------------------------------|--------------------------------------------------------------------------------------------------------|-------------------------------------------------------------------------------------------------------------------------------------|
|              |        |                                               |               |                                                                                                                                                                                                                                  |                                                                                                        | activity, retinol binding, metal ion binding, NAD or NADH binding                                                                   |
| NM_024674    | LIN28A | lin-28 homolog A (C. elegans)                 | 1.81133<br>33 | regulation of transcription, DNA-dependent, miRNA catabolic process, stem cell maintenance, gene silencing by RNA, pre-microRNA processing, RNA 3'-end processing, positive regulation of translation, stem cell differentiation | cytoplasmic mRNA processing body, nucleus, nucleolus, cytoplasm, stress granule                        | DNA binding, RNA binding, mRNA binding, protein binding, zinc ion binding, translation initiation factor binding, metal ion binding |
| NM_003096    | SNRPG  | small nuclear ribonucleoprotein polypeptide G | 1.78090<br>55 | spliceosome assembly, spliceosomal snRNP assembly, mRNA processing, RNA splicing                                                                                                                                                 | Nucleus, nucleoplasm, spliceosomal complex, U7 snRNP, cytosol, small nuclear ribonucleoprotein complex | RNA binding, protein binding                                                                                                        |
| NM_145740    | GSTA1  | glutathione S-transferase alpha 1             | 1.73613<br>6  | glutathione metabolic process, metabolic process                                                                                                                                                                                 | cytoplasm                                                                                              | glutathione transferase activity, transferase activity                                                                              |
| NM_138374    | ZNF845 | zinc finger protein 845                       | 1.71546<br>89 | regulation of transcription, DNA-dependent                                                                                                                                                                                       | Intracellular, nucleus                                                                                 | DNA binding, zinc ion binding, metal ion binding                                                                                    |
| NM_001166292 | PTCH2  | patched 2                                     | 1.71452<br>98 | protein complex assembly, spermatogenesis, epidermis                                                                                                                                                                             | integral to plasma membrane, membrane                                                                  | transmembrane receptor activity, hedgehog receptor activity                                                                         |

|              |          |                                                     |           |                                                                                                                                                                                                 |                                                                                                 |                                                                                                                                                                       |
|--------------|----------|-----------------------------------------------------|-----------|-------------------------------------------------------------------------------------------------------------------------------------------------------------------------------------------------|-------------------------------------------------------------------------------------------------|-----------------------------------------------------------------------------------------------------------------------------------------------------------------------|
|              |          |                                                     |           | development,<br>hair cycle,<br>skin<br>development                                                                                                                                              |                                                                                                 |                                                                                                                                                                       |
| NM_005276    | GPD1     | glycerol-3-phosphate dehydrogenase 1 (soluble)      | 1.6811809 | carbohydrate metabolic process, gluconeogenesis, NADH oxidation, triglyceride biosynthetic process, glycerol-3-phosphate catabolic process, glycerolipid metabolic process, oxidation reduction | soluble fraction, cytoplasm, mitochondrion, cytosol, glycerol-3-phosphate dehydrogenase complex | glycerol-3-phosphate dehydrogenase [NAD+] activity, glycerol-3-phosphate dehydrogenase activity, binding, protein homodimerization activity, NAD or NADH binding      |
| NM_018260    | ZNF701   | zinc finger protein 701                             | 1.6715703 | regulation of transcription, DNA-dependent                                                                                                                                                      | Intracellular, nucleus, nucleolus, centrosome                                                   | DNA binding, zinc ion binding, metal ion binding                                                                                                                      |
| NM_013391    | DMGDH    | dimethylglycine dehydrogenase                       | 1.6701851 | glycine metabolic process, glycine catabolic process, choline metabolic process, oxidation reduction                                                                                            | Cytoplasm, mitochondrion, mitochondrial matrix                                                  | aminomethyltransferase activity, folic acid binding, electron carrier activity, oxidoreductase activity, dimethylglycine dehydrogenase activity, FAD or FADH2 binding |
| NR_027279    | USP17L6P | ubiquitin specific peptidase 17-like 6 (pseudogene) | 1.6537292 | ubiquitin-dependent protein catabolic process                                                                                                                                                   | Nucleus, cytoplasm                                                                              | ubiquitin thiolesterase activity, peptidase activity, cysteine-type peptidase activity                                                                                |
| AK301230     | ZNF724P  | zinc finger protein 724, pseudogene                 | 1.6330806 | regulation of transcription, DNA-dependent                                                                                                                                                      | Intracellular, nucleus                                                                          | DNA binding, zinc ion binding, metal ion binding                                                                                                                      |
| NM_001144989 | ZNF814   | zinc finger protein 814                             | 1.6276867 | regulation of transcription, DNA-                                                                                                                                                               | intracellular                                                                                   | nucleic acid binding, zinc ion binding, metal ion                                                                                                                     |

|                 |          |                                                             |           | dependent                                                                                 |                                                                                                                                           | binding                                                                                             |
|-----------------|----------|-------------------------------------------------------------|-----------|-------------------------------------------------------------------------------------------|-------------------------------------------------------------------------------------------------------------------------------------------|-----------------------------------------------------------------------------------------------------|
| NM_032117       | MND1     | meiotic nuclear divisions 1 homolog (S. cerevisiae)         | 1.6238732 | DNA recombination, meiosis                                                                | nucleus                                                                                                                                   | DNA binding, protein binding                                                                        |
| NM_002491       | NDUFB3   | NADH dehydrogenase (ubiquinone) 1 beta subcomplex, 3, 12kDa | 1.6154936 | mitochondrial electron transport, NADH to ubiquinone, transport, electron transport chain | Mitochondrion, mitochondrial inner membrane, mitochondrial respiratory chain complex I, membrane, integral to membrane, respiratory chain | NADH dehydrogenase (ubiquinone) activity                                                            |
| ENST00000357491 | ZNF729   | zinc finger protein 729                                     | 1.5924025 | regulation of transcription, DNA-dependent                                                | Intracellular, nucleus                                                                                                                    | DNA binding, zinc ion binding, metal ion binding                                                    |
| NM_001114120    | DEPDC1   | DEP domain containing 1                                     | 1.5782831 | signal transduction                                                                       | Intracellular, nucleus                                                                                                                    | GTPase activator activity                                                                           |
| NM_001005216    | OR2J3    | olfactory receptor, family 2, subfamily J, member 3         | 1.5708201 | sensory perception of smell, response to stimulus                                         | plasma membrane, integral to membrane                                                                                                     | receptor activity, olfactory receptor activity                                                      |
| NM_152355       | ZNF441   | zinc finger protein 441                                     | 1.5660714 | regulation of transcription, DNA-dependent                                                | Intracellular, nucleus                                                                                                                    | DNA binding, zinc ion binding, metal ion binding                                                    |
| NM_018365       | MNS1     | meiosis-specific nuclear structural 1                       | 1.5621987 | meiosis                                                                                   | Nucleus, nuclear envelope, intermediate filament                                                                                          | ---                                                                                                 |
| NM_001130862    | RAD51AP1 | RAD51 associated protein 1                                  | 1.5577438 | double-strand break repair via homologous recombination, DNA repair, DNA recombination    | nucleus                                                                                                                                   | DNA binding, double-stranded DNA binding, single-stranded DNA binding, RNA binding, protein binding |
| NM_153699       | GSTA5    | glutathione S-transferase                                   | 1.5575311 | metabolic process                                                                         | cytoplasm                                                                                                                                 | glutathione transferase                                                                             |

|           |        |                           |           |                                                                                                                                                                                                                                                                                                                                                                                                                                                                                            |                                                                        |                                                                                                                                                                                                                                                                      |
|-----------|--------|---------------------------|-----------|--------------------------------------------------------------------------------------------------------------------------------------------------------------------------------------------------------------------------------------------------------------------------------------------------------------------------------------------------------------------------------------------------------------------------------------------------------------------------------------------|------------------------------------------------------------------------|----------------------------------------------------------------------------------------------------------------------------------------------------------------------------------------------------------------------------------------------------------------------|
|           |        | alpha 5                   |           |                                                                                                                                                                                                                                                                                                                                                                                                                                                                                            |                                                                        | activity, transferase activity                                                                                                                                                                                                                                       |
| NM_203307 | ZNF321 | zinc finger protein 321   | 1.557367  | regulation of transcription, DNA-dependent                                                                                                                                                                                                                                                                                                                                                                                                                                                 | intracellular                                                          | nucleic acid binding                                                                                                                                                                                                                                                 |
| NM_001786 | CDK1   | cyclin-dependent kinase 1 | 1.5500718 | protein complex assembly, protein phosphorylation, anti apoptosis, mitosis, mitotic cell cycle G2/M transition DNA damage checkpoint, small GTPase mediated signal transduction, Ras protein signal transduction, cell aging, response to toxin, positive regulation of gene expression, response to organic cyclic substance, response to amine stimulus, response to activity, intracellular signaling pathway, chromosome condensation, organ regeneration, anaphase-promoting complex- | Nucleus, nucleoplasm, cytoplasm, cytosol, spindle microtubule, midbody | nucleotide binding, protein kinase activity, cyclin-dependent protein kinase activity, protein binding, ATP binding, RNA polymerase II carboxy-terminal domain kinase activity, transferase activity, cyclin binding, Hsp70 protein binding, histone kinase activity |

|  |  |  |                                                                                                                                                                                                                                                                                                                                                                                                                                                                                                                                                                                                                                                                                                                                                         |  |
|--|--|--|---------------------------------------------------------------------------------------------------------------------------------------------------------------------------------------------------------------------------------------------------------------------------------------------------------------------------------------------------------------------------------------------------------------------------------------------------------------------------------------------------------------------------------------------------------------------------------------------------------------------------------------------------------------------------------------------------------------------------------------------------------|--|
|  |  |  | dependent<br>proteasomal<br>ubiquitin-<br>dependent<br>protein<br>catabolic<br>process,<br>positive<br>regulation of<br>protein import<br>into nucleus,<br>translocation,<br>protein<br>localization to<br>kinetochore,<br>response to<br>drug,<br>response to<br>ethanol,<br>positive<br>regulation of<br>DNA<br>replication,<br>positive<br>regulation of<br>mitotic cell<br>cycle,<br>response to<br>cadmium ion,<br>response to<br>copper ion,<br>response to<br>axon injury,<br>cell division,<br>positive<br>regulation of<br>ubiquitin-<br>protein ligase<br>activity<br>involved in<br>mitotic cell<br>cycle,<br>ventricular<br>cardiac<br>muscle cell<br>development,<br>positive<br>regulation of<br>cardiac<br>muscle cell<br>proliferation, |  |
|--|--|--|---------------------------------------------------------------------------------------------------------------------------------------------------------------------------------------------------------------------------------------------------------------------------------------------------------------------------------------------------------------------------------------------------------------------------------------------------------------------------------------------------------------------------------------------------------------------------------------------------------------------------------------------------------------------------------------------------------------------------------------------------------|--|

|           |         |                                                                  |           |                                                                                                  |                                                                                                                     |                                                                                                                                                   |
|-----------|---------|------------------------------------------------------------------|-----------|--------------------------------------------------------------------------------------------------|---------------------------------------------------------------------------------------------------------------------|---------------------------------------------------------------------------------------------------------------------------------------------------|
|           |         |                                                                  |           | cellular response to hydrogen peroxide, cellular response to protein stimulus                    |                                                                                                                     |                                                                                                                                                   |
| NM_031292 | PUS7L   | pseudouridylate synthase 7 homolog ( <i>S. cerevisiae</i> )-like | 1.5481175 | pseudouridine synthesis, tRNA processing                                                         | ---                                                                                                                 | RNA binding, pseudouridine synthase activity, isomerase activity                                                                                  |
| NM_001077 | UGT2B17 | UDP glucuronosyltransferase 2 family, polypeptide B17            | 1.538956  | metabolic process, steroid metabolic process                                                     | membrane fraction, endoplasmic reticulum, endoplasmic reticulum membrane, microsome, membrane, integral to membrane | retinoic acid binding, glucuronosyltransferase activity                                                                                           |
| NM_033625 | RPL34   | ribosomal protein L34                                            | 1.5367559 | Translation, translational elongation                                                            | Intracellular, cytosol, ribosome, cytosolic large ribosomal subunit                                                 | RNA binding, structural constituent of ribosome, protein binding                                                                                  |
| NM_005420 | SULT1E1 | sulfotransferase family 1E, estrogen-preferring, member 1        | 1.5356219 | female pregnancy, steroid metabolic process, estrogen metabolic process, sulfation               | Cytoplasm, cytosol                                                                                                  | estrone sulfotransferase activity, steroid binding, transferase activity, flavonol 3-sulfotransferase activity, steroid sulfotransferase activity |
| L23320    | RFC1    | replication factor C (activator 1) 1, 145kDa                     | 1.525963  | DNA-dependent DNA replication, nucleotide-excision repair, DNA gap filling, telomere maintenance | Intracellular, nucleus, nucleoplasm, DNA replication factor C complex                                               | nucleotide binding, DNA clamp loader activity, protein binding, ATP binding, enzyme activator activity, nucleoside-triphosphatase activity        |



|              |         |                                                        |           |                                                                                                                                                                                                            |                                       |                                                                                                                                                                                                                                                                                                                                                                            |
|--------------|---------|--------------------------------------------------------|-----------|------------------------------------------------------------------------------------------------------------------------------------------------------------------------------------------------------------|---------------------------------------|----------------------------------------------------------------------------------------------------------------------------------------------------------------------------------------------------------------------------------------------------------------------------------------------------------------------------------------------------------------------------|
|              |         |                                                        |           | via telomerase, regulation of transcription                                                                                                                                                                |                                       |                                                                                                                                                                                                                                                                                                                                                                            |
| NM_000782    | CYP24A1 | cytochrome P450, family 24, subfamily A, polypeptide 1 | 1.5255178 | osteoblast differentiation, steroid metabolic process, response to vitamin D, vitamin D metabolic process, oxidation reduction, vitamin D receptor signaling pathway, vitamin D receptor signaling pathway | Mitochondrial inner membrane          | 25-hydroxycholecalciferol-24-hydroxylase activity, electron carrier activity, oxidoreductase activity, oxidoreductase activity, acting on paired donors, with incorporation or reduction of molecular oxygen, NADH or NADPH as one donor, and incorporation of one atom of oxygen, heme binding, 1-alpha,25-dihydroxyvitamin D3 24-hydroxylase activity, metal ion binding |
| NM_001005216 | OR2J3   | olfactory receptor, family 2, subfamily J, member 3    | 1.5223784 | sensory perception of smell, response to stimulus                                                                                                                                                          | plasma membrane, integral to membrane | receptor activity, olfactory receptor activity                                                                                                                                                                                                                                                                                                                             |
| NM_001005216 | OR2J3   | olfactory receptor, family 2, subfamily J, member 3    | 1.5223784 | sensory perception of smell, response to stimulus                                                                                                                                                          | plasma membrane, integral to membrane | receptor activity, olfactory receptor activity                                                                                                                                                                                                                                                                                                                             |
| NM_000847    | GSTA3   | glutathione S-transferase alpha 3                      | 1.5218192 | metabolic process                                                                                                                                                                                          | cytoplasm                             | glutathione transferase activity, transferase activity                                                                                                                                                                                                                                                                                                                     |
| NM_006865    | LILRA3  | leukocyte immunoglobulin-like receptor, subfamily A    | 1.5192223 | defense response, signal transduction                                                                                                                                                                      | extracellular region, plasma membrane | antigen binding, receptor activity                                                                                                                                                                                                                                                                                                                                         |

|           |       |                                                                                |           |                                                                                                                                                                                        |                                                                   |                                                                                 |
|-----------|-------|--------------------------------------------------------------------------------|-----------|----------------------------------------------------------------------------------------------------------------------------------------------------------------------------------------|-------------------------------------------------------------------|---------------------------------------------------------------------------------|
|           |       | (without TM domain), member 3                                                  |           |                                                                                                                                                                                        |                                                                   |                                                                                 |
| NM_003080 | SMPD2 | sphingomyelin phosphodiesterase 2, neutral membrane (neutral sphingomyelinase) | 1.5082734 | sphingomyelin metabolic process, intracellular protein kinase cascade, induction of apoptosis by extracellular signals, response to mechanical stimulus, ceramide biosynthetic process | membrane fraction, integral to plasma membrane, caveola, membrane | sphingomyelin phosphodiesterase activity, hydrolase activity, metal ion binding |
| NM_006451 | PAIP1 | poly(A) binding protein interacting protein 1                                  | 1.5062508 | translational initiation, regulation of translation, RNA metabolic process, mRNA stabilization                                                                                         | cytoplasm                                                         | RNA binding, protein binding, translation activator activity                    |

**Table S4:** Gene Ontology analysis of DGE >1.5 fold due to aSiNP-116 exposure at 100 mg/L dose for 24 h

| <b>Biological Processes</b>           |                     |                 |                       |
|---------------------------------------|---------------------|-----------------|-----------------------|
| <b><u>Term</u></b>                    | <b><u>Count</u></b> | <b><u>%</u></b> | <b><u>p-Value</u></b> |
| steroid metabolic process             | 11                  | 7.1             | 3.3E-7                |
| cholesterol biosynthetic process      | 6                   | 3.8             | 4.0E-7                |
| sterol biosynthetic process           | 6                   | 3.8             | 1.9E-6                |
| steroid biosynthetic process          | 7                   | 4.5             | 1.1E-5                |
| cholesterol metabolic process         | 7                   | 4.5             | 1.8E-5                |
| lipid biosynthetic process            | 11                  | 7.1             | 2.2E-5                |
| sterol metabolic process              | 7                   | 4.5             | 3.1E-5                |
| isoprenoid metabolic process          | 4                   | 2.6             | 2.3E-3                |
| isoprenoid biosynthetic process       | 3                   | 1.9             | 6.3E-3                |
| oxidation reduction                   | 9                   | 5.8             | 3.7E-2                |
| muscle contraction                    | 4                   | 2.6             | 6.4E-2                |
| fibrinolysis                          | 2                   | 1.3             | 7.0E-2                |
| G2/M transition DNA damage checkpoint | 2                   | 1.3             | 7.5E-2                |
| muscle system process                 | 4                   | 2.6             | 8.0E-2                |
| alcohol catabolic process             | 3                   | 1.9             | 8.5E-2                |
| G2/M transition checkpoint            | 2                   | 1.3             | 9.2E-2                |
| <b>Cellular component</b>             |                     |                 |                       |
| <b><u>Term</u></b>                    | <b><u>Count</u></b> | <b><u>%</u></b> | <b><u>p-Value</u></b> |
| endoplasmic reticulum membrane        | 5                   | 3.2             | 8.2E-2                |

|                                                |   |     |        |
|------------------------------------------------|---|-----|--------|
| nuclear envelope-endoplasmic reticulum network | 5 | 3.2 | 9.5E-2 |
|------------------------------------------------|---|-----|--------|

| <b>Molecular Function</b>                                                      |              |          |                |
|--------------------------------------------------------------------------------|--------------|----------|----------------|
| <b>Term</b>                                                                    | <b>Count</b> | <b>%</b> | <b>p-Value</b> |
| glutathione transferase activity                                               | 4            | 2.6      | 3.2E-4         |
| transferase activity, transferring alkyl or aryl<br>(other than methyl) groups | 5            | 3.2      | 3.3E-4         |
| Hsp70 protein binding                                                          | 2            | 1.3      | 2.7E-2         |
| heme binding                                                                   | 4            | 2.6      | 4.9E-2         |
| antigen binding                                                                | 3            | 1.9      | 5.5E-2         |
| tetrapyrrole binding                                                           | 4            | 2.6      | 5.7E-2         |
| retinal binding                                                                | 2            | 1.3      | 7.8E-2         |

**Table S5:** Real-time RT-PCR validation of some selected genes from microarray results of aSiNP-116 exposure<sup>a</sup>

|              | <b>Gene Name</b> | <b>Microarray DGE</b> | <b>qRT-PCR</b> |
|--------------|------------------|-----------------------|----------------|
| Cholesterol  | CYP51A1          | + 1.53                | + 1.73         |
| Biosynthesis | ACSS2            | + 1.91                | + 1.92         |
| Pathway      | MVD              | + 1.77                | + 1.97         |
|              | FDPS             | + 1.56                | + 1.78         |
|              | HMGCS1           | + 1.52                | + 1.76         |
|              | HMGCR            | +1.4                  | + 2.87         |
|              | SREBF1           | + 1.22                | + 1.59         |
|              | SREBF2           | +1.41                 | + 2.38         |
|              | Others           | CDK1                  | -1.55          |
|              | KCNJ10           | + 1.61                | + 2.17         |

<sup>a</sup>: The (+) sign indicated the up-regulation and (-) indicated down-regulation of mRNA levels

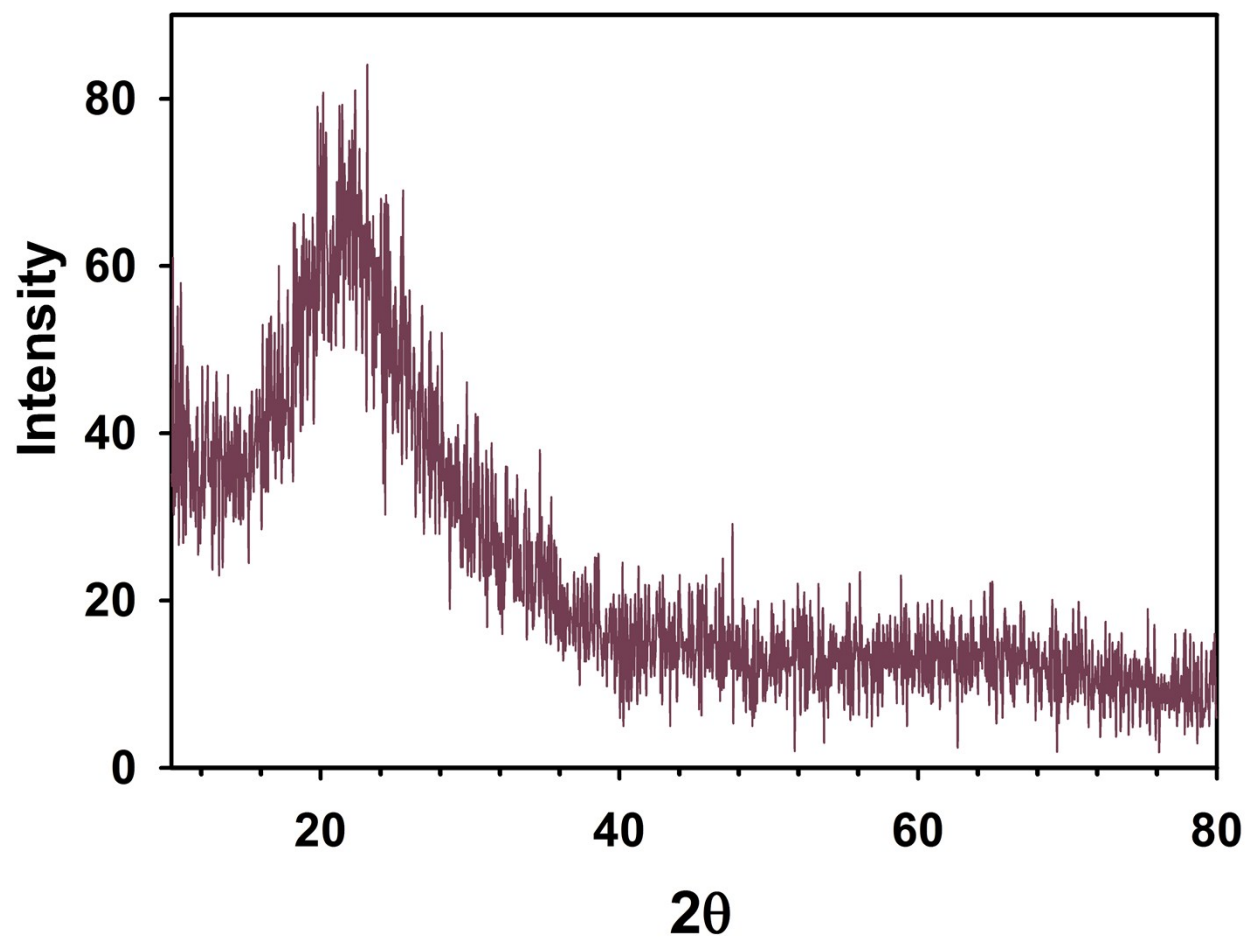

Figure S1

Figure S1: X-ray diffraction (XRD) pattern of aSiNP-116.

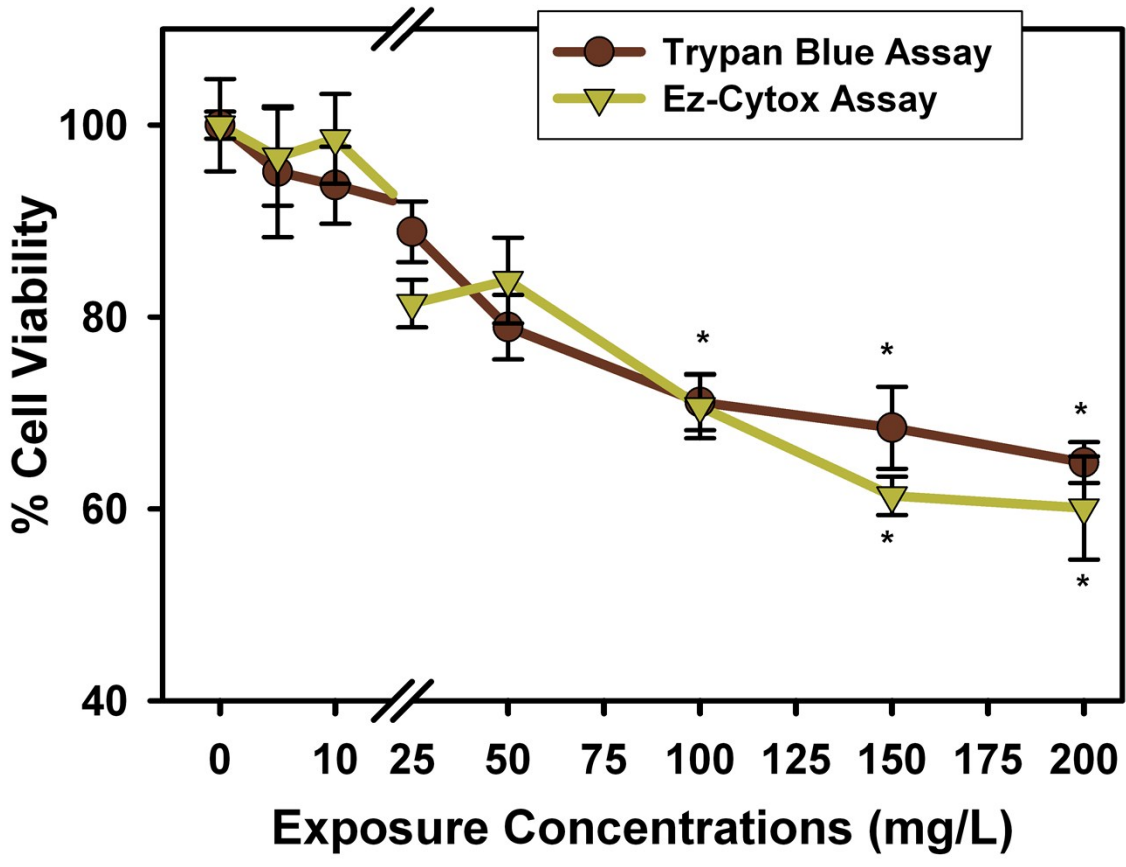

Figure S2A

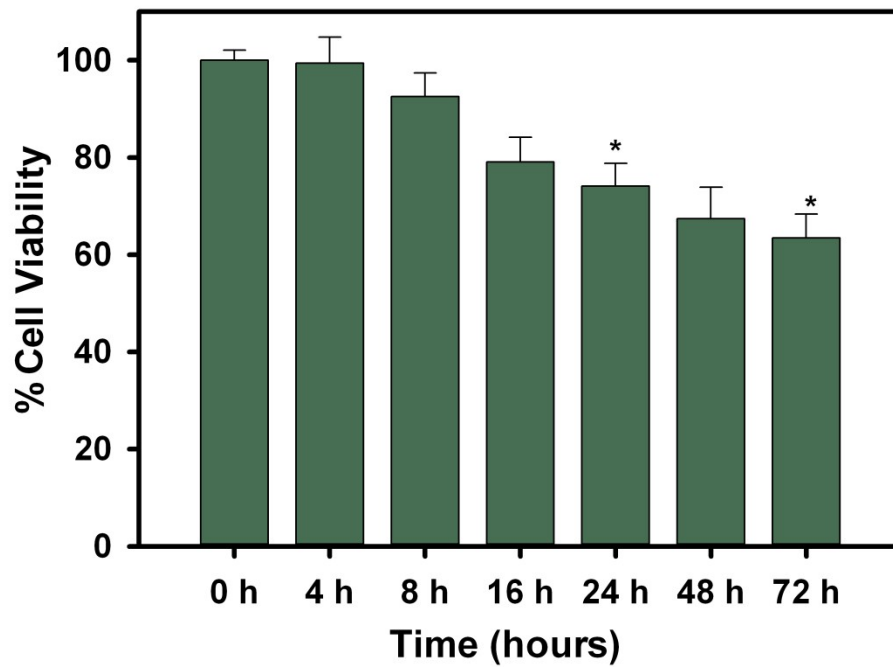

**Figure S2B**

**Figure S2:** Cytotoxicity of aSiNP-116 in HepG2 cells. **A.** Cytotoxicity determined by Ez-cytox assay and trypan blue exclusion method. **B.** Cells exposed at 100 mg/L at different time points and cytotoxicity determined by Ez-cytox assay. Data presented as mean  $\pm$  SEM., \* $p < 0.05$ .



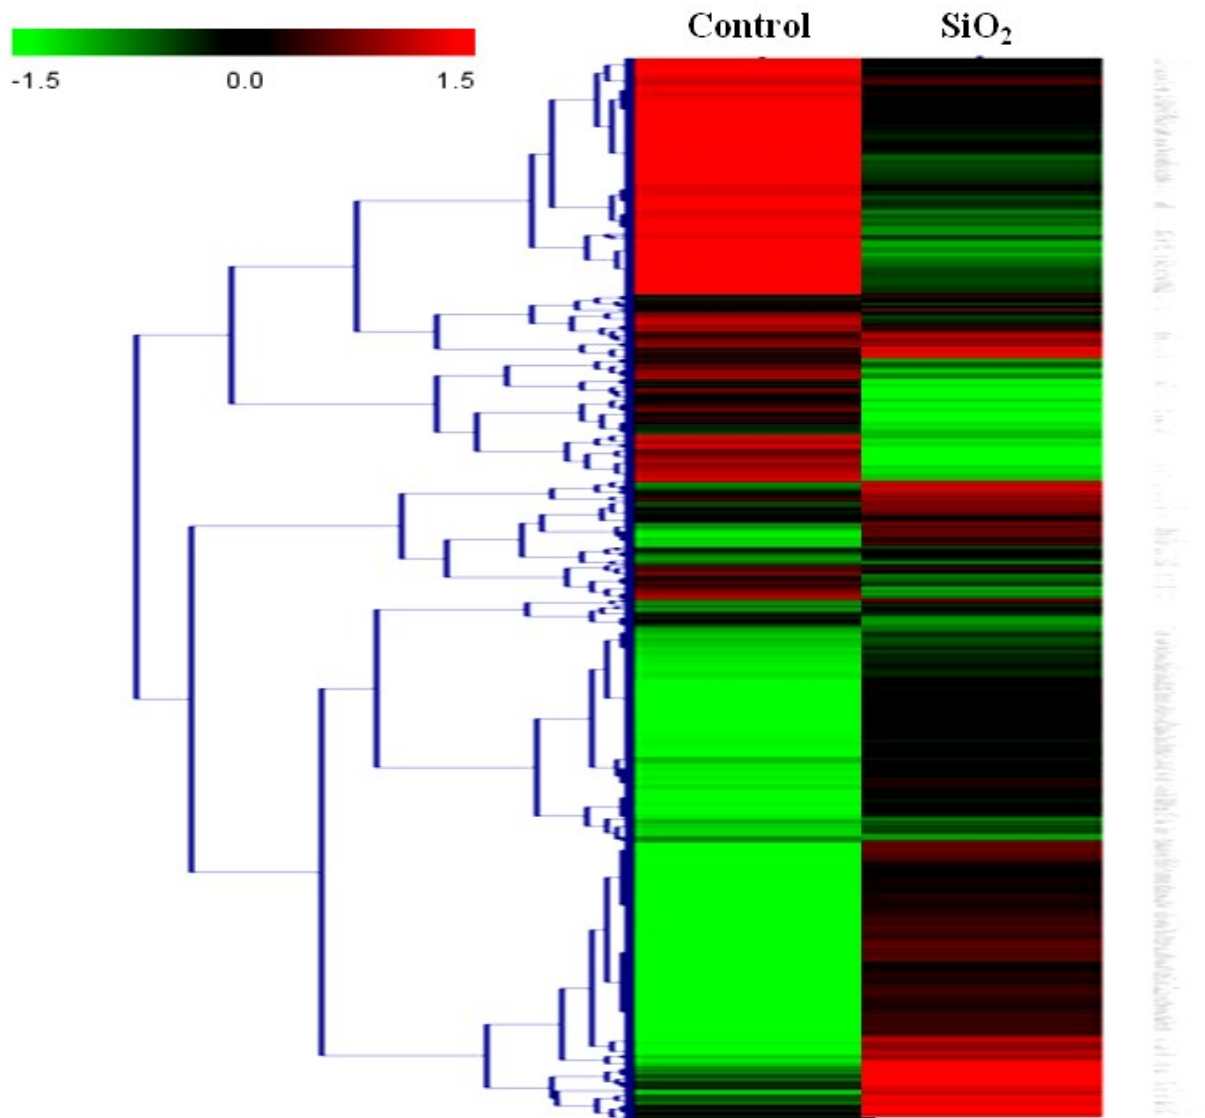

**Figure S3:** Hierarchical cluster analysis of genes with more than 1.5-fold change in expression in aSiNP-116 exposed cells compared to untreated control cells. The bar relates the color code to the expression value.

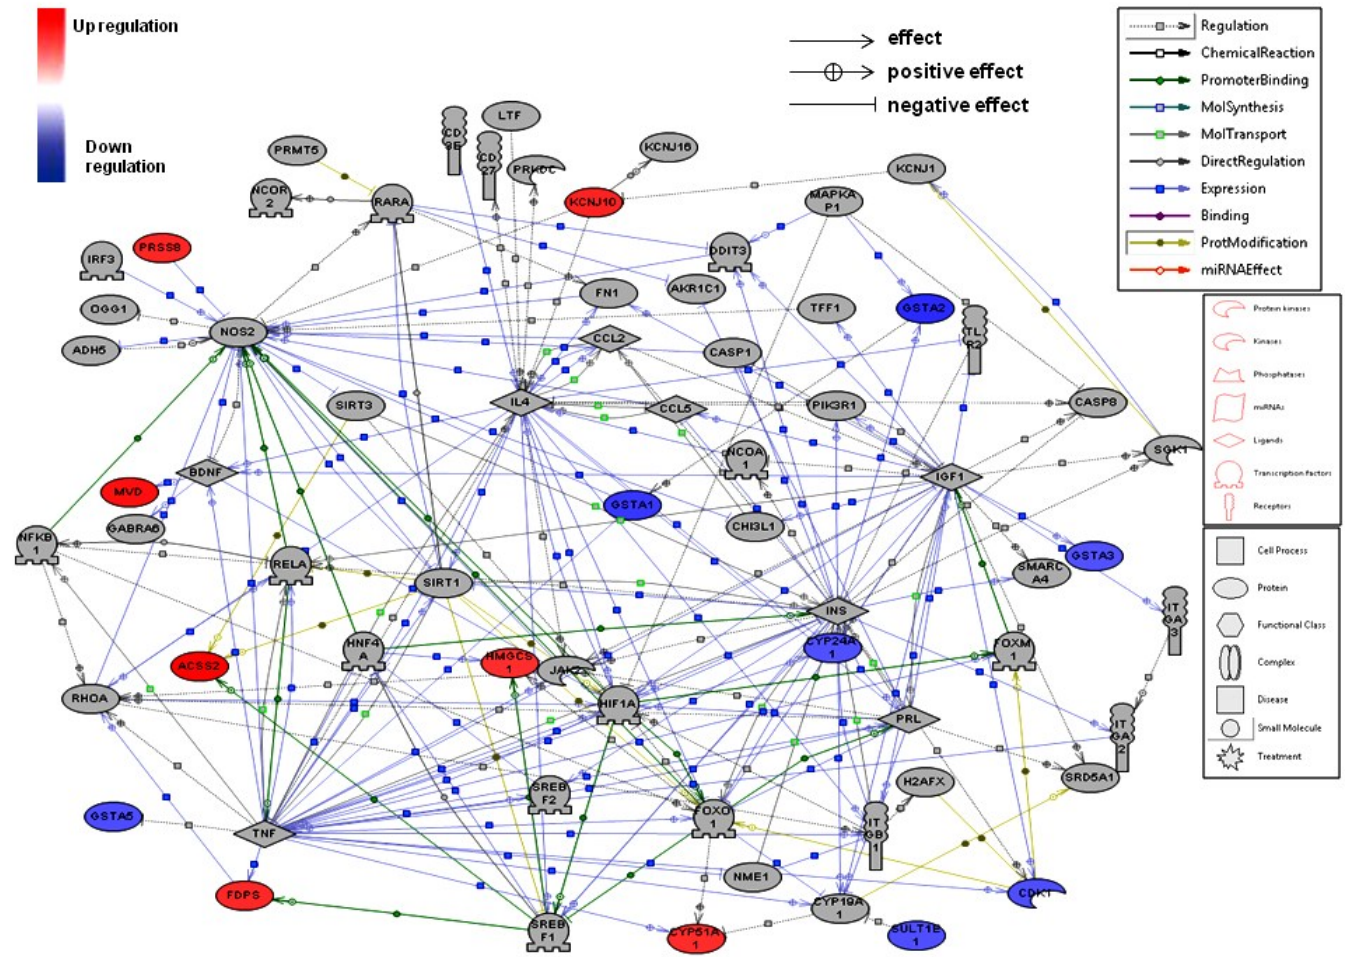

**Figure S4:** Network analysis by pathway studio of aSiNP-116 mediated biological response in HepG2 cells.

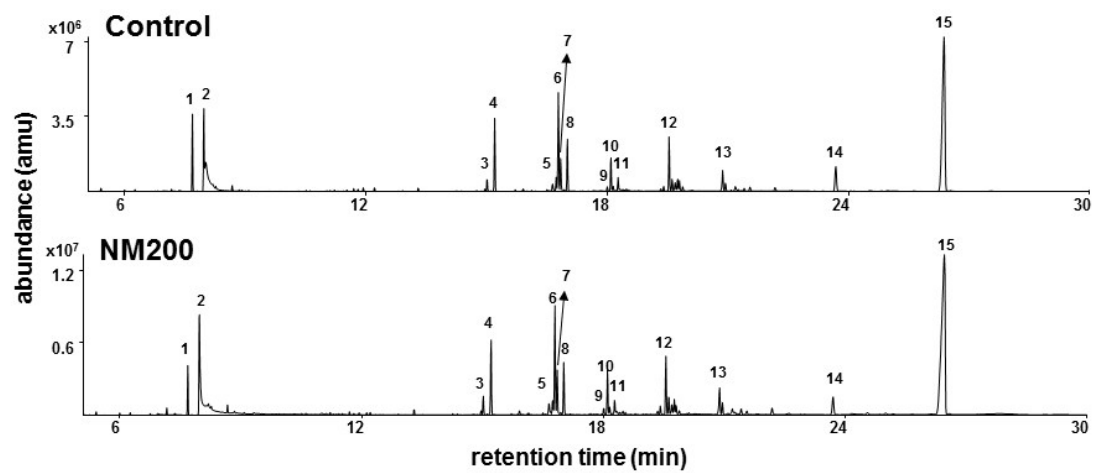

1. Diethylene glycol; 2. Silanol; 3. palmitic acid; 4. palmitoleic acid; 5. oleic acid (isomer); 6. oleic acid; 7. cis-octadecanoic acid; 8. stearic acid; 9. myristic acid; 10. arachidonic acid; 11. eicosatrienoic acid; 12. monopalmitin; 13. 1-monooleoylglycerol; 14. cholesta-3,5-diene; 15. cholesterol

**Figure S5A**

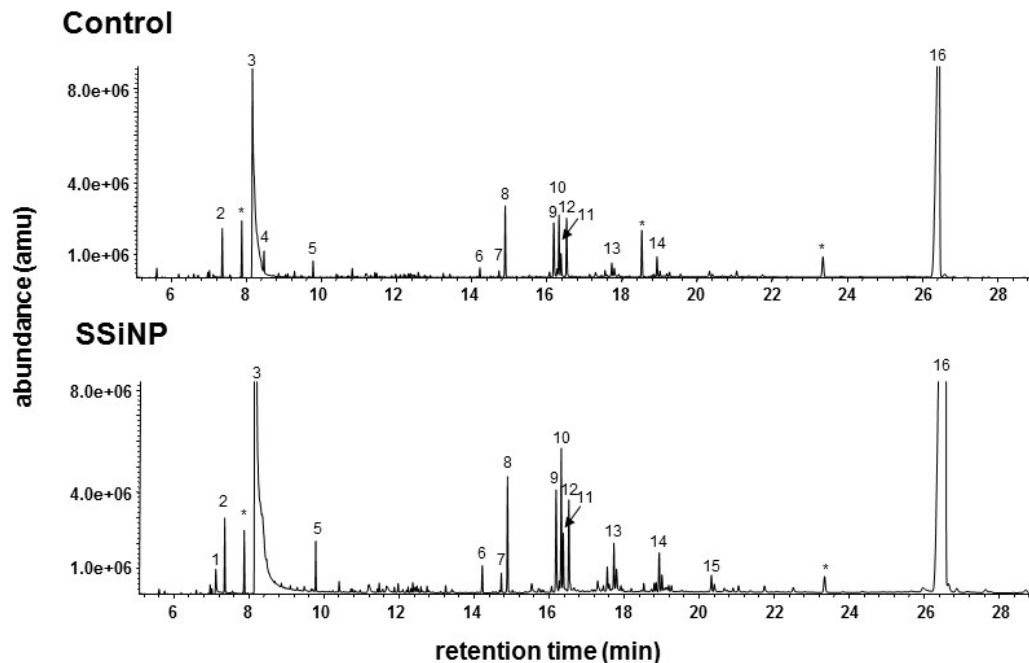

1. monomethylphosphate; 2. malic acid; 3. phosphoric acid; 4. proline; 5. *O*-hydroxybenzaldehyde; 6. dibutylphthalate; 7. palmitoleic acid; 8. palmitic acid; 9. unknown; 10. oleic acid; 11. oleic acid (isomer); 12. stearic acid; 13. di(2-ethylhexyl) adipate; 14. monopalmitin; 15. monostearin; 16. cholesterol; \* byproducts of TMS

Figure S5B

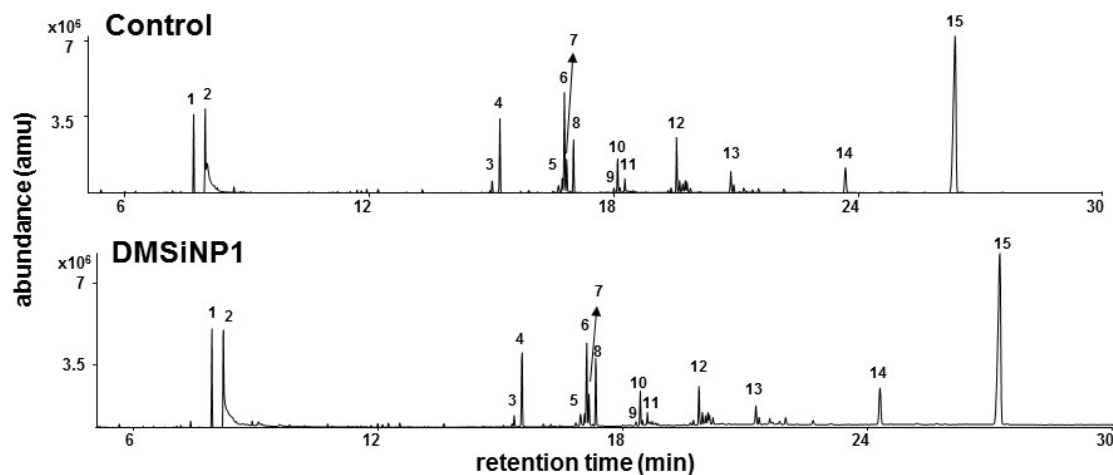

1. Diethylene glycol; 2. Silanol; 3. palmitic acid; 4. palmitoleic acid; 5. oleic acid (isomer); 6. oleic acid; 7. *cis*-octadecanoic acid; 8. stearic acid; 9. myristic acid; 10. arachidonic acid; 11. eicosatrienoic acid; 12. monopalmitin; 13. 1-monooleoylglycerol; 14. cholesta-3,5-diene; 15. cholesterol

Figure S5C

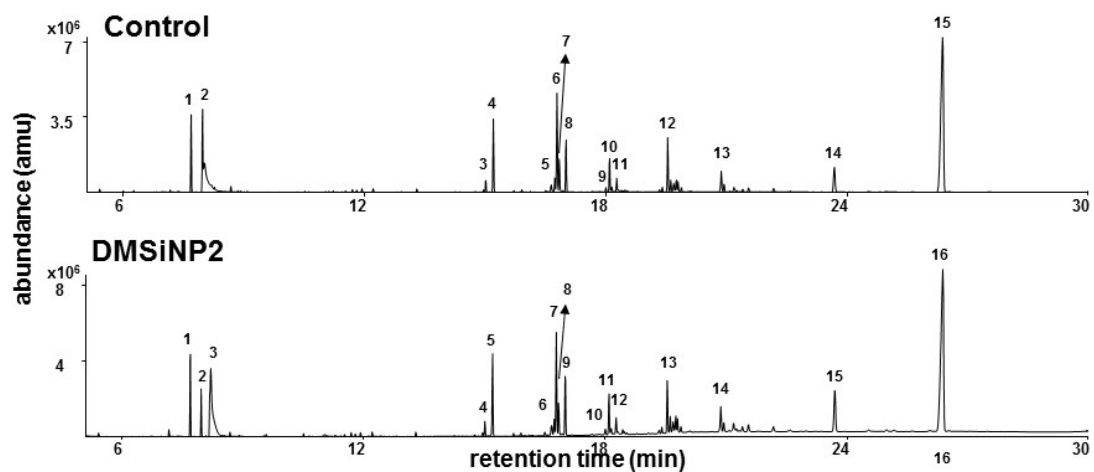

1. Diethylene glycol; 2. glycerol; 3. Silanol; 4. palmitic acid; 5. palmitoleic acid; 6. oleic acid (isomer); 7. oleic acid; 8. cis-octadecanoic acid; 9. stearic acid; 10. myristic acid; 11. arachidonic acid; 12. eicosatrienoic acid; 13. monopalmitin; 14. 1-monooleoylglycerol; 15. cholesta-3,5-diene; 16. cholesterol

## Figure S5D

**Figure S5:** GC-MS spectra of fatty acid and lipid metabolites from HepG2 cells treated (100 mg/L for 24 h) and untreated (control) with aSiNPs. **A.** GC-MS spectra of aSiNP-189. **B.** GC-MS spectra of aSiNP-116. **C.** GC-MS spectra of aSiNP-26. **D.** GC-MS spectra of aSiNP-8.

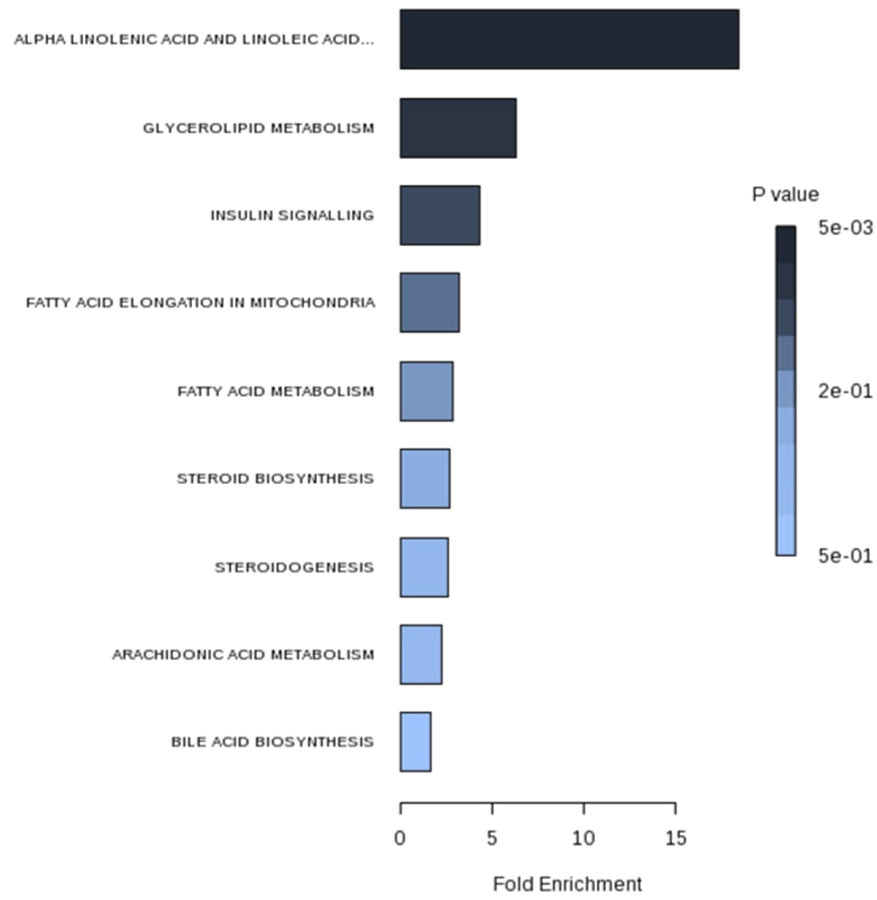

**Figure S6A**

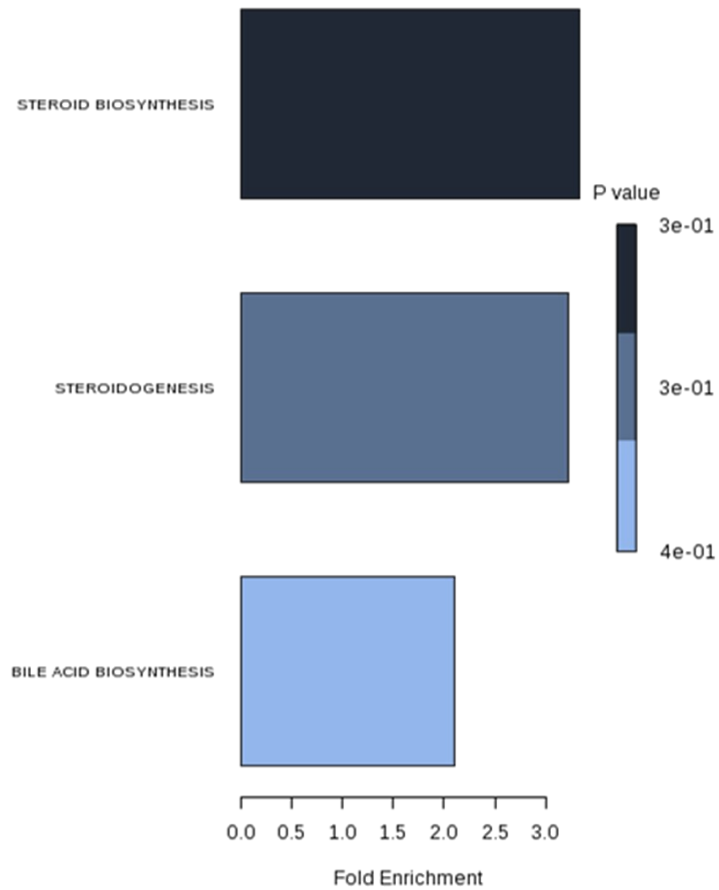

**Figure S6B**

**Figure S6: Pathway enrichment analysis** performed by Metaboanalyst 3.0 **based on** GC-MS (>1.5 folds). **A.** altered metabolites due to aSiNP-189 exposure (100 mg/L) for 24 h. **B.** Altered metabolites due to aSiNP-116 exposure (100 mg/L). No pathways were found for aSiNP-26 and aSiNP-8.
